# Supplementary material
Source: PubMed Central journal article supplement (PMC6014692)
Supplement: EHP1447.s001.acco.pdf [file EHP1447.s001.acco.pdf]

**Note to readers with disabilities:** *EHP* strives to ensure that all journal content is accessible to all readers. However, some figures and Supplemental Material published in *EHP* articles may not conform to [508 standards](#) due to the complexity of the information being presented. If you need assistance accessing journal content, please contact [ehp508@niehs.nih.gov](mailto:ehp508@niehs.nih.gov). Our staff will work with you to assess and meet your accessibility needs within 3 working days.

### **Supplemental Material**

#### **Fine Particulate Air Pollution and the Expression of microRNAs and Circulating Cytokines Relevant to Inflammation, Coagulation, and Vasoconstriction**

Renjie Chen, Huichu Li, Jing Cai, Cuicui Wang, Zhijing Lin, Cong Liu, Yue Niu, Zhuohui Zhao, Weihua Li, Haidong Kan

#### **Table of Contents**

**Table S1.** The basic information for assay kits of cytokines in this study.

**Table S2.** miRNAs selected for cytokine genes and the basis for their selection.

**Table S3.** The estimates for the order term, the period term and the intervention×period interaction term in the main linear mixed-effect models.

**Table S1.** The basic information for assay kits of cytokines in this study.

| Cytokines     | Manufacturers | Location of production                                                | Limits of detection |
|---------------|---------------|-----------------------------------------------------------------------|---------------------|
| IL-1          | Thermofisher  | Bender MedSystems GmbH Campus Vienna Biocenter 2,1030 Vienna, Austria | 0.16 pg/mL          |
| IL-6          | Thermofisher  | Bender MedSystems GmbH Campus Vienna Biocenter 2,1030 Vienna, Austria | 0.08 pg/mL          |
| TNF- $\alpha$ | Thermofisher  | Bender MedSystems GmbH Campus Vienna Biocenter 2,1030 Vienna, Austria | 0.31 pg/mL          |
| TLR-2         | Raybiotech    | 3607 Parkway Lane Suite 200 Norcross, GA 30092                        | 0.32 ng/ml ng/ml    |
| CD40L         | Raybiotech    | 3607 Parkway Lane Suite 200 Norcross, GA 30092                        | 6 pg/ml             |
| ICAM-1        | Raybiotech    | 3607 Parkway Lane Suite 200 Norcross, GA 30092                        | 150 pg/ml           |
| F3            | Assaypro      | 3400 Harry S Truman Blvd St. Charles, MO 63301-4046, USA              | 12.5 pg/ml          |
| PAI-1         | Thermofisher  | Bender MedSystems GmbH Campus Vienna Biocenter 2,1030 Vienna,Austria  | 78 pg/mL            |
| ET-1          | Enzo          | 10 Executive Blvd Farmingdale, NY 11735 USA                           | 2 pg/ml             |
| ACE-1         | Rnd           | 614 McKinley Place NE Minneapolis, MN 55413 USA                       | 0.78 ng/mL          |

Abbreviations: IL-1, interleukin-1; IL-6, interleukin-6; TNF- $\alpha$ , tumor necrosis factor- $\alpha$ ; TLR-2, toll-like receptot-2; CD40L, CD40 ligand; ICAM-1, intercellular adhesion molecule-1; F3, tissue factor; PAI-1: plasminogen activator inhibitor-1; ET-1, endothelin-1; ACE-1, angiotensin converting enzyme-1.

**Table S2.** miRNAs selected for cytokine genes and the basis for their selection

| <b>miRNA</b> | <b>Gene</b>     | <b>Basis for miRNA selection<sup>a</sup></b>           |
|--------------|-----------------|--------------------------------------------------------|
| miR-21-5p    | <i>IL1</i>      | miRTarBase (reporter assay and qPCR)                   |
| miR-26a-5p   | <i>IL6</i>      | miRTarBase (reporter assay)                            |
| miR-187-3p   | <i>TNF</i>      | miRTarBase (reporter assay and qPCR), EXIQON           |
| miR-146a-5p  | <i>TLR2</i>     | miRTarBase (reporter assay, western blot, and qPCR)    |
| miR-19b-3p   | <i>TLR2</i>     | miRTarBase (reporter assay, western blot, and qPCR)    |
| miR-146a-5p  | <i>CD40LG</i>   | miRTarBase (reporter assay, western blot, and qPCR)    |
| miR-21-5p    | <i>ICAM1</i>    | miRTarBase (reporter assay and qPCR)                   |
| miR-93-5p    | <i>ICAM1</i>    | miRTarBase (qPCR)                                      |
| miR-146a-5p  | <i>ICAM1</i>    | miRTarBase (western blot and qPCR)                     |
| miR-19b-3p   | <i>F3</i>       | EXIQON                                                 |
| miR-93-5p    | <i>F3</i>       | miRDB (score=98)                                       |
| miR-145-5p   | <i>SERPINE1</i> | miRTarBase (reporter assay, western blot, and qPCR)    |
| miR-1-3p     | <i>EDN1</i>     | miRTarBase (reporter assay and qPCR), miRDB (score=95) |
| miR-199a-5p  | <i>EDN1</i>     | miRTarBase (reporter assay), EXIQON                    |
| miR-4492     | <i>ACE</i>      | miRDB (score=100)                                      |

<sup>a</sup> miRTarBase: strong evidence based on reporter assay, western blot, or qPCR (<http://mirtarbase.mbc.nctu.edu.tw/php/search.php#target>); EXIQON: validated in EXIQON database (<https://www.exiqon.com/miRSearch>); miRDB: listed in miRDB database with score  $\geq 95$  (<http://www.mirdb.org/miRDB/>).

**Table S3.** The estimates for the order term, the period term and the intervention×period interaction term <sup>b</sup> in the main linear mixed-effect models.

| Biomarkers  | Order |         |      | Period |         |      | Interaction |         |      |
|-------------|-------|---------|------|--------|---------|------|-------------|---------|------|
|             | Beta  | p-value | FDR  | Beta   | p-value | FDR  | Beta        | p-value | FDR  |
| microRNAs   |       |         |      |        |         |      |             |         |      |
| miR-21-5p   | -10   | 0.71    | 0.97 | 66     | 0.08    | 0.15 | 22          | 0.44    | 0.75 |
| miR-26a-5p  | 3     | 0.90    | 0.97 | 24     | 0.47    | 0.56 | 10          | 0.70    | 0.89 |
| miR-187-3p  | -8    | 0.78    | 0.97 | -72    | 0.03    | 0.08 | 24          | 0.45    | 0.89 |
| miR-146a-5p | -18   | 0.58    | 0.97 | -87    | 0.03    | 0.08 | 36          | 0.29    | 0.74 |
| miR-19b-3p  | -64   | 0.17    | 0.93 | 122    | 0.01    | 0.08 | -16         | 0.75    | 0.89 |
| miR-93-5p   | -19   | 0.37    | 0.97 | 115    | 0.01    | 0.08 | 7           | 0.77    | 0.89 |
| miR-145-5p  | 3     | 0.93    | 0.97 | -71    | 0.05    | 0.11 | 27          | 0.48    | 0.76 |
| miR-1-3p    | 22    | 0.51    | 0.97 | -82    | 0.02    | 0.08 | 31          | 0.40    | 0.89 |
| miR-199a-5p | -20   | 0.37    | 0.93 | -21    | 0.43    | 0.54 | 5           | 0.80    | 0.89 |
| miR-4492    | 36    | 0.21    | 0.93 | -85    | 0.02    | 0.08 | 24          | 0.43    | 0.75 |
| mRNAs       |       |         |      |        |         |      |             |         |      |
| IL1         | -18   | 0.52    | 0.93 | 19     | 0.52    | 0.60 | -27         | 0.32    | 0.74 |
| IL6         | 31    | 0.34    | 0.97 | 26     | 0.30    | 0.40 | -31         | 0.26    | 0.74 |
| TNF         | -6    | 0.77    | 0.97 | 25     | 0.13    | 0.23 | -22         | 0.21    | 0.74 |
| TLR2        | 2     | 0.92    | 0.97 | 26     | 0.26    | 0.39 | -11         | 0.62    | 0.89 |
| CD40LG      | 2     | 0.92    | 0.97 | 36     | 0.08    | 0.15 | -3          | 0.89    | 0.89 |

|               |     |      |      |     |      |      |     |      |      |
|---------------|-----|------|------|-----|------|------|-----|------|------|
| ICAM1         | 1   | 0.97 | 0.97 | -26 | 0.31 | 0.40 | -13 | 0.56 | 0.85 |
| F3            | 9   | 0.74 | 0.97 | -81 | 0.03 | 0.08 | 10  | 0.71 | 0.89 |
| SERPINE1      | -14 | 0.59 | 0.97 | -42 | 0.03 | 0.08 | -41 | 0.05 | 0.37 |
| EDN1          | -23 | 0.31 | 0.93 | 11  | 0.74 | 0.79 | -65 | 0.01 | 0.09 |
| ACE           | -2  | 0.94 | 0.97 | 56  | 0.05 | 0.11 | -39 | 0.15 | 0.75 |
| Cytokines     |     |      |      |     |      |      |     |      |      |
| IL-1          | -33 | 0.10 | 0.97 | -48 | 0.02 | 0.08 | -52 | 0.01 | 0.09 |
| IL-6          | 19  | 0.68 | 0.97 | 4   | 0.92 | 0.92 | 6   | 0.89 | 0.89 |
| TNF- $\alpha$ | 15  | 0.35 | 0.93 | -20 | 0.23 | 0.36 | 15  | 0.31 | 0.74 |
| TLR-2         | 7   | 0.66 | 0.97 | -58 | 0.01 | 0.08 | -3  | 0.84 | 0.89 |
| CD40L         | -22 | 0.11 | 0.93 | -39 | 0.01 | 0.08 | -29 | 0.01 | 0.14 |
| ICAM-1        | -15 | 0.15 | 0.93 | 2   | 0.90 | 0.92 | -16 | 0.16 | 0.74 |
| F3            | -3  | 0.89 | 0.97 | 8   | 0.28 | 0.40 | -15 | 0.18 | 0.74 |
| PAI-1         | -8  | 0.43 | 0.93 | -4  | 0.60 | 0.66 | -8  | 0.38 | 0.74 |
| ET-1          | -25 | 0.33 | 0.93 | -15 | 0.16 | 0.26 | -15 | 0.32 | 0.74 |
| ACE-1         | -12 | 0.23 | 0.93 | 12  | 0.06 | 0.13 | 2   | 0.78 | 0.89 |

Note: The order term was included into the models by two levels: "1" for the true-to-sham order, and "0" for the sham-to-true order; The period term was included into the models by two levels: "1" for the first stage, and "0" for the second stage.

Abbreviations as in Table S1.
